# Supplementary material
Source: PubMed Central journal article supplement (PMC7141388)
Supplement: jciinsight-5-132306-s044.pdf [file jciinsight-5-132306-s044.pdf]

## Supplemental Figures

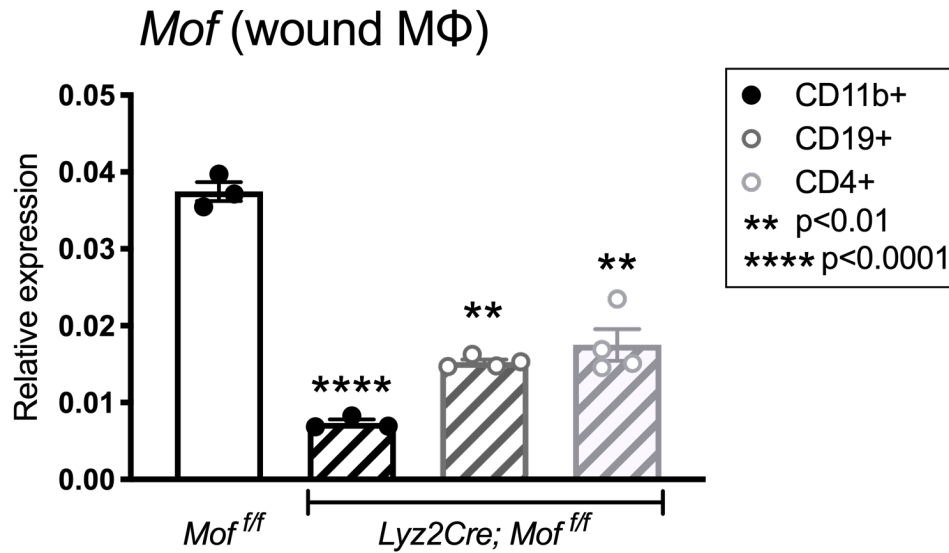

### Supplemental Figure 1. *Mof* is specifically deleted in myeloid populations in

***Lyz2Cre;Mof*<sup>f/f</sup> wounds.** Representative figure showing myeloid-specific deletion of *Mof* in *Lyz2Cre;Mof*<sup>f/f</sup> wounds. Macrophages (CD11b<sup>+</sup>, n=3), B cells (CD19<sup>+</sup>, n=4), and T cells (CD4<sup>+</sup>, n=4) were FACS sorted from *Lyz2Cre; Mof*<sup>f/f</sup> wounds harvested at day 5 post-wounding. *Mof* gene expression was measured by qPCR (n=3 mice pooled/replicate, repeated 2x). Data were analyzed using a 1-way ANOVA followed by Sidak's multiple comparison's test comparing each mean to *Mof*<sup>f/f</sup> control CD11b<sup>+</sup>.

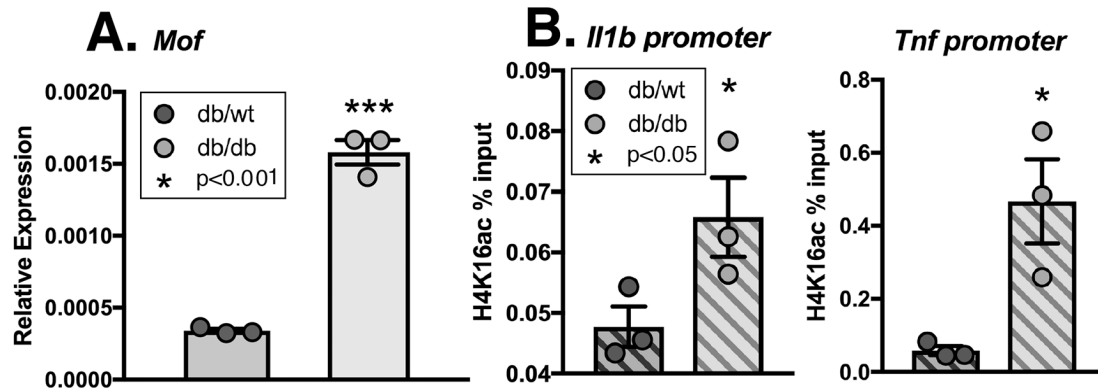

**Supplemental Figure 2. MOF is elevated and H4K16ac is enriched on NFkB genes in db/db wound macrophages.** A. Representative figure of *Mof* expression in db/db wound macrophages. Three wounds were created using a 6 mm punch on the backs of db/db or db/+ mice and wound macrophages (CD11b<sup>+</sup>CD3<sup>-</sup>CD19<sup>-</sup>Ly6G<sup>-</sup>) were isolated on day 5 post-injury. *Mof* expression was measured by qPCR (n=3 x 3 mice pooled/replicate; repeated 2x). B. Representative figure showing increased H4K16ac deposition on inflammatory cytokine promoters. ChIP analysis was performed for H4K16ac at NFkB binding sites on the *Il1b* and *Tnf* promoters (n=3 x 4 mice pooled/replicate, repeated 2x). Data was analyzed using a 2-tailed Student's *t*-test.

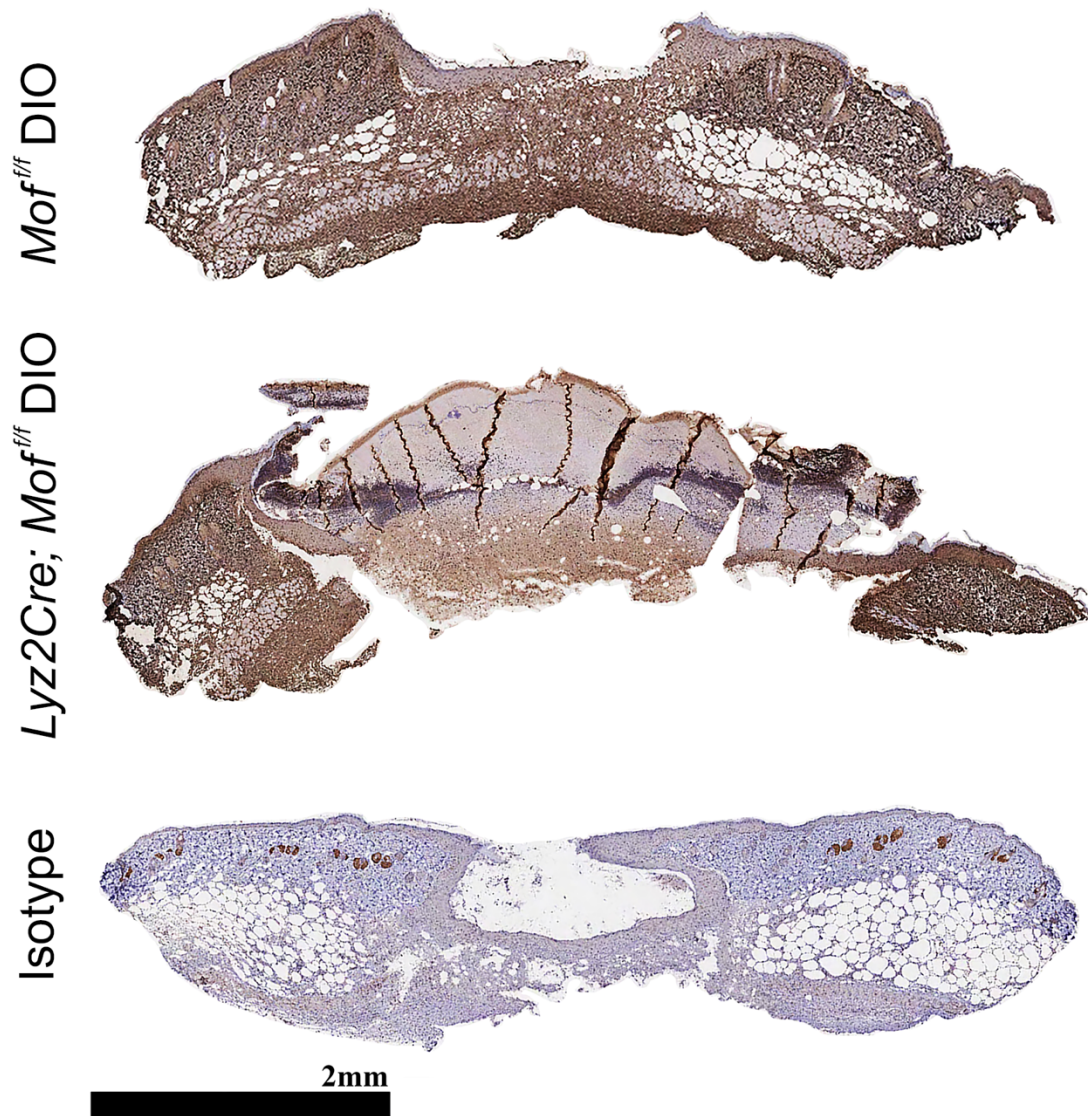

**Supplemental Figure 3. Collagen deposition is increased in *Mof* deleted wounds.**

Representative figures showing collagen deposition in day 5 *Lyz2Cre;Mof<sup>fl/fl</sup>* DIO wounds.

Wounds from DIO *Lyz2Cre; Mof<sup>fl/fl</sup>* or DIO *Mof<sup>fl/fl</sup>* mice were harvested on day 5 post-injury and processed for histology and stained using an antibody for collagen 1 (Rockland, 600-406-103) (n=6 mice/group). An isotype stain is included as a control. Black bar indicate 2 mm scale

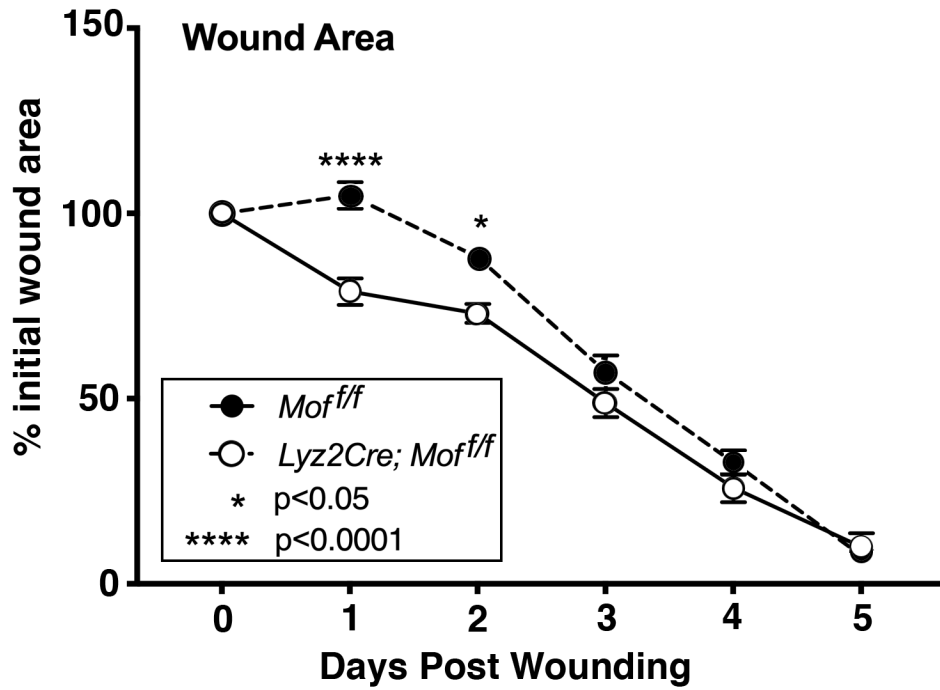

**Supplemental Figure 4. *Mof* deletion improves early wound healing.** Representative figure showing wound closure in *Lyz2Cre; Mof<sup>f/f</sup>* and *Mof<sup>f/f</sup>* control mice on a standard diet. Two wounds were created using 6 mm punch biopsies on the backs of *Lyz2Cre; Mof<sup>f/f</sup>* or *Mof<sup>f/f</sup>* mice fed a standard chow diet. Change in wound area was analyzed daily using ImageJ software (n=6 mice/group)

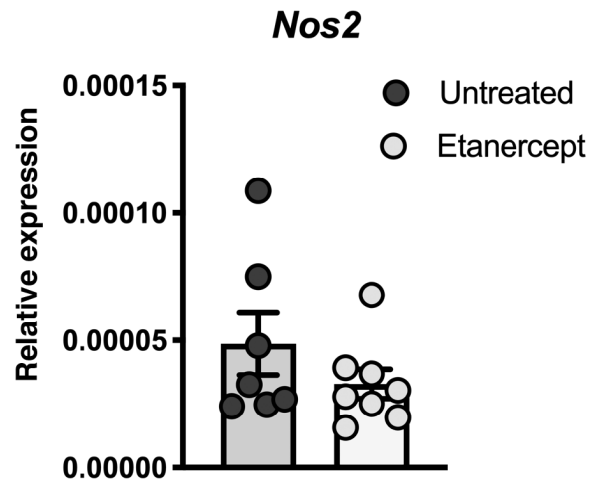

**Supplemental Figure 5. *Nos2* expression in DIO wound macrophages is reduced by TNF $\alpha$  inhibition *ex vivo*.** Representative figure showing *Nos2* expression in wound macrophages treated with Etanercept *ex vivo*. Wound macrophages (CD11b<sup>+</sup>CD3<sup>-</sup> CD19<sup>-</sup>Ly6G<sup>-</sup>) were isolated on day 5 post-injury from DIO mice and stimulated *ex vivo* with 250 mg/ml Etanercept or vehicle for 12 hours. *Nos2* expression was measured by qPCR. Data was analyzed using a 1-tailed Student's *t*-test with Welch's correction.

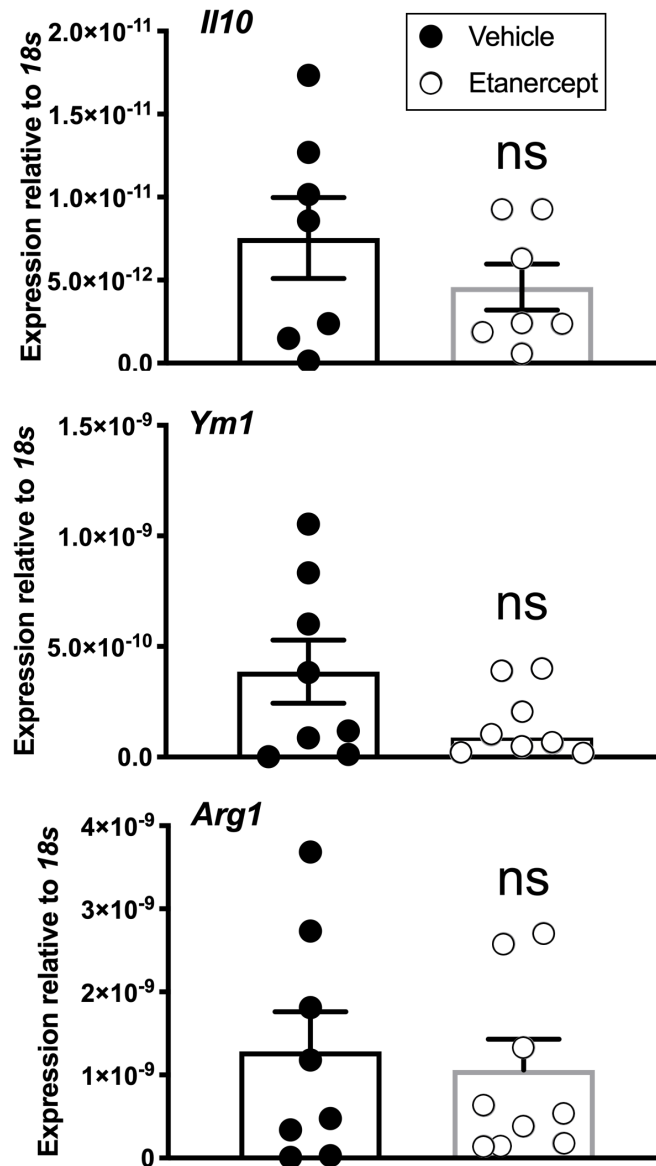

**Supplemental Figure 6. Etanercept treatment has no effect on expression of anti-inflammatory genes in DIO wound macrophages.** Representative figure showing anti-inflammatory gene expression in wound macrophages treated with Etanercept *ex vivo*. Wound macrophages (CD11b<sup>+</sup>CD3<sup>-</sup>CD19<sup>-</sup>Ly6G<sup>-</sup>) were isolated on day 5 post-injury from DIO mice and stimulated *ex vivo* with 250 mg/ml Etanercept or vehicle for 12 hours. *Il10*, *Arg1*, and *Ym1* expression was measured by qPCR. Data was analyzed using a 1-tailed Student's *t*-test with Welch's correction.

| Patient Characteristic  | Non-diabetic | Diabetic   |
|-------------------------|--------------|------------|
| Age                     | 73.3 (10.9)  | 64.3 (3.2) |
| Male                    | 100%         | 50%        |
| BMI                     | 28.3 (1.6)   | 31.2 (1.8) |
| Prior Tobacco Use       | 66%          | 83%        |
| Diabetes                | N/A          | 100%       |
| Hgb A1c                 | N/A          | 8.4 (0.3)  |
| Hypertension            | 100%         | 83%        |
| Hyperlipidemia          | 66%          | 83%        |
| Coronary Artery Disease | 33%          | 17%        |
| Medications             |              |            |
| Insulin Dependent       | N/A          | 33%        |
| Oral Hyperglycemic      | N/A          | 66%        |
| Immunosuppressants      | 0%           | 0%         |

**Supplemental Table 1:** Metadata table of patient groups used in this study.

BMI, body mass index; Hgb A1c, hemoglobin A1C; N/A, non-applicable.

Continuous variables expressed as mean (SEM) and categorical variables expressed as percentages.
